# Supplementary material for: JunB condensation attenuates vascular endothelial damage under hyperglycemic condition
Source: PubMed Central journal article supplement — J Mol Cell Biol. 2023 Dec 22;15(12):mjad072. doi: 10.1093/jmcb/mjad072 (PMC11080659; doi:10.1093/jmcb/mjad072), 2023-12-22
Supplement: mjad072_supplemental_file.pdf [file mjad072_supplemental_file.pdf]

## Supplementary material

### **JunB condensation attenuates vascular endothelial damage under hyperglycemic condition**

Xuxia Ren<sup>1,†</sup>, Zexu Cui<sup>1,†</sup>, Qiaoqiao Zhang<sup>2</sup>, Zhiguang Su<sup>3</sup>, Wei Xu<sup>1</sup>, Jinhui Wu<sup>4,\*</sup>,  
and Hao Jiang<sup>1,\*</sup>

<sup>1</sup> Laboratory for Aging and Cancer Research, Frontiers Science Center Disease-related Molecular Network, State Key Laboratory of Respiratory Health and Multimorbidity and National Clinical Research Center for Geriatrics, West China Hospital, Sichuan University, Chengdu 610041, China

<sup>2</sup> Key Laboratory of Gene Engineering of the Ministry of Education, State Key Laboratory of Biocontrol, School of Life Sciences, Sun Yat-sen University, Guangzhou 510275, China

<sup>3</sup> Molecular Medicine Research Center, West China Hospital, Sichuan University, Chengdu 610041, China

<sup>4</sup> Center of Geriatrics and Gerontology, National Clinical Research Center for Geriatrics, West China Hospital, Sichuan University, Chengdu 610041, China

<sup>†</sup> These authors contributed equally to this work.

\* Correspondence to: Jinhui Wu, E-mail; wujinhui@scu.edu.cn; Hao Jiang, E-mail: haojiang@scu.edu.cn

This PDF file includes:

Supplementary Materials and methods

Supplementary Reference

Supplementary Figures S1–S4

Supplementary Tables S1–S3

## **Supplementary Materials and methods**

### ***Western blotting***

Cells grown in 6-well plates were washed twice with PBS, and 100  $\mu$ l of cell lysis buffer was added to each well. The adherent cells were scraped off with cell scraping on ice and centrifuged at 12000 rpm for 20 min at 4°C. The supernatant was transferred to a new centrifuge tube. To measure the protein concentration, we used the BCA Kit (BOSTER). Protein loading buffer was added to a metal bath at 100°C for 5 min. Approximately 20  $\mu$ g of protein per sample was subjected to sodium dodecyl sulfate–polyacrylamide gel electrophoresis (SDS–PAGE) and then transferred to PVDF membranes (Millipore). After sealing with QuickBlock™ Blocking Buffer for Western Blotting (Beyotime) for 1 h, the membranes were incubated with anti-JunB antibody (1:1000, Abcam) or anti-tubulin antibody (1:1000, Cell Signaling Technology). After washing three times with PBST for 10 min, goat anti-rabbit secondary antibodies (1:5000, Thermo) were added and incubated at room temperature for 1 h. After washing three times with PBST for 10 min, ECL Prime Western Blotting Detection Reagent (Thermo) was used to detect chemiluminescent signals.

### ***Coomassie brilliant blue staining***

The purified JunB protein was separated by SDS–PAGE and then stained with Coomassie brilliant blue staining solution and 60% perchloric acid. The stained gel was washed with water until the background staining was fully removed.

### ***JunB protein purification***

To express and purify His-JunB protein, the plasmid containing His-JunB was transformed into *E. coli* BL21, and a single colony was selected and cultured in 10 ml of LB medium. After 16 h, the colony was poured into 1 L of fresh LB medium and cultured at 37°C and 220 rpm. When the OD600 reached 0.6–0.8, 1 mM IPTG was added to induce protein expression. The mixture was incubated at 16°C and 220 rpm for 16 h and centrifuged at 4°C, 3800 rpm to collect bacteria. Then, lysis buffer (50 mM NaH<sub>2</sub>PO<sub>4</sub>, 300 mM NaCl, 10 mM imidazole, 1 mM PMSF, pH 8) was added to the bacteria, followed by ultrasonic lysis for 15 min, and the supernatant was collected at 4°C, 12000 rpm. The supernatants were added to the columns with Ni-NTA beads (Qiagen). After slowly rotating for 4 h, the unbound proteins were washed with wash buffer (50 mM NaH<sub>2</sub>PO<sub>4</sub>, 300 mM NaCl, 20 mM imidazole, pH 8). Finally, elution buffer (50 mM NaH<sub>2</sub>PO<sub>4</sub>, 300 mM NaCl, 500 mM imidazole, pH 8) was used to elute the protein. The protein collected in elution was concentrated by an Amicon Ultra 30K device (Millipore). At the same time, frozen fresh PBS was added, and the process was repeated three times to a volume of 200–500  $\mu$ l. The purified protein was quantified using an ND-2000C

NanoDrop spectrophotometer (NanoDrop Technologies).

JunB protein purified *in vitro* was mixed with sodium chloride and DNA fragments (3×TRE or 7×TRE) at different concentrations. JunB protein was added to a flow cell and placed at 37°C for 2 min. The sequences of 3×TRE are TGACTCATGACTCATGACTCA (5'-3') and TGAGTCATGAGTCATGAGTCA (3'-5'). The sequences of 7×TRE are TGACTCATGACTCATGACTCATGACTCATGACTCATGACTCATGACTCA (5'-3') and TGAGTCATGAGTCATGAGTCATGAGTCATGAGTCATGAGTCATGAGTCA (3'-5').

### ***Sequence analysis for protein disorder***

We used the PONDR program (<http://www.disprot.org/index.php>) to analyze disordered regions of JunB at default settings (Xue et al., 2010). Three predictors (VLXT, VL3, and VSL2B) indicated that JunB has a high disorder disposition.

### ***Extraction of vascular ECs***

C57BL/6 mice and db/db mice were purchased from Gempharmatech Company. After the neck was severed in C57BL/6 mice or db/db mice, the aorta was cut off from the heart link to the tip of the abdominal aorta with microscopic scissors and then placed on pre-cooled PBS. The connective tissue and fascia around the blood vessels were separated under a microscope. The vascular lumen was cut lengthwise, and the blood vessels were digested with type 2 collagenase (2 mg/ml) at 37°C for 30 min. The digested cells were filtered with a 70- $\mu$ m cell sieve and stained with CD31 (BD Biosciences), and the positive cells were sorted and collected by flow cytometry.

### ***ChIP-qPCR***

After cell adhesion culture, the number of cells was  $\geq 1 \times 10^7$ . Sample preparation was performed using a SimpleChIP Enzymatic Chromatin IP Kit. The protein and DNA were cross-linked and added into a 15-cm petri dish containing 20 ml medium with 540  $\mu$ l of 37% formaldehyde until the final concentration was 1% and incubated at room temperature for 10 min (the cell density for suspended cells was  $< 0.5 \times 10^6$ /ml). The crosslinking reaction was terminated by adding glycine (10 $\times$ ). Pre-cooled PBS was added to the petri dish (1% cocktail was added), the cells were scraped off, and nuclear preparation and chromatin digestion continued. The cells were suspended in 1 ml of 1 $\times$ Buffer A (250  $\mu$ l 4 $\times$  Buffer A (#7006) plus 750  $\mu$ l ddH<sub>2</sub>O) and incubated on ice for 10 min. The cell suspension was centrifuged at 2000 $\times$  g, 4°C for 5 min, and the supernatant was removed and discarded. Then, 1.1 ml of 1 $\times$ Buffer B (275  $\mu$ l 4 $\times$ Buffer B (#7007) plus 825  $\mu$ l ddH<sub>2</sub>O) was prepared, and cells were suspended in 1 ml of 1 $\times$ Buffer B. After centrifugation, the supernatant was discarded and re-concentrated. After centrifugation, the supernatant was removed and re-suspended in 100  $\mu$ l

of 1× Buffer B. The samples were transferred to a 1.5-ml centrifuge tube, and each sample was added with 0.5 µl Micrococcal Nuclease to digest the DNA fragments on ice for 20 min. After 10 µl 0.5 M EDTA was added to stop digestion, the cell membrane was broken by ultrasound with several pulses. Then, the samples were centrifuged at 9400×g, 4°C for 10 min to clarify the dissolved matter. ChIP was performed by adding 400 µl of 1× ChIP Buffer (40 µl 10× ChIP Buffer (#7008) plus 360 µl ddH<sub>2</sub>O) and 100 µl (5–10 µg) of chromatin to each sample. Meanwhile, the corresponding antibodies and IgG were added. Histone H3 (D2B12) XPs rabbit mAb (#4620) was used as a positive control group, and IgG (#2729) was used as a negative control group. The IP sample was incubated at 4°C for 4 h. Then, 30 µl of ChIP protein G magnetic bead (#9006) was added to each IP reaction and incubated at 4°C for 2 h. Each immunoprecipitation tube with protein G beads was placed in a magnetic separator for 1–2 min, and the superserum was carefully removed. The low-salt wash was repeated three times. Then, 1 ml of high-salt washing solution was added, and the mixture was rotate at 4°C for 5 min. For elution of chromatin in antibody/protein G magnetism, 150 µl of 1× ChIP elution buffer was added to each IP sample and incubated at 65°C, 30 min by gently swirling the tube. The eluted chromatin supernatant was carefully transferred to a new tube by placing the tube on a magnetic separation rack to make granular protein G magnetic beads and waiting 1–2 min for the solution to be clear. All samples were added with 6 µl 5M NaCl and 2 µl protease K (#10012) and incubated at 65°C for 2 h. DNA was purified using columns, and 50 µl DNA eluting buffer (#10009) was added to each rotating column and placed in a clean 1.5-ml centrifuge tube, followed by centrifugation at 18500×g for 30 sec to elute DNA. SimpleChIP Universal qPCR Master Mix was used for amplification.

### **Supplementary References**

Xue, B., Dunbrack, R.L., Williams, R.W. et al. (2010). PONDR-FIT: a meta-predictor of intrinsically disordered amino acids. *Biochim Biophys Acta* 1804, 996-1010.

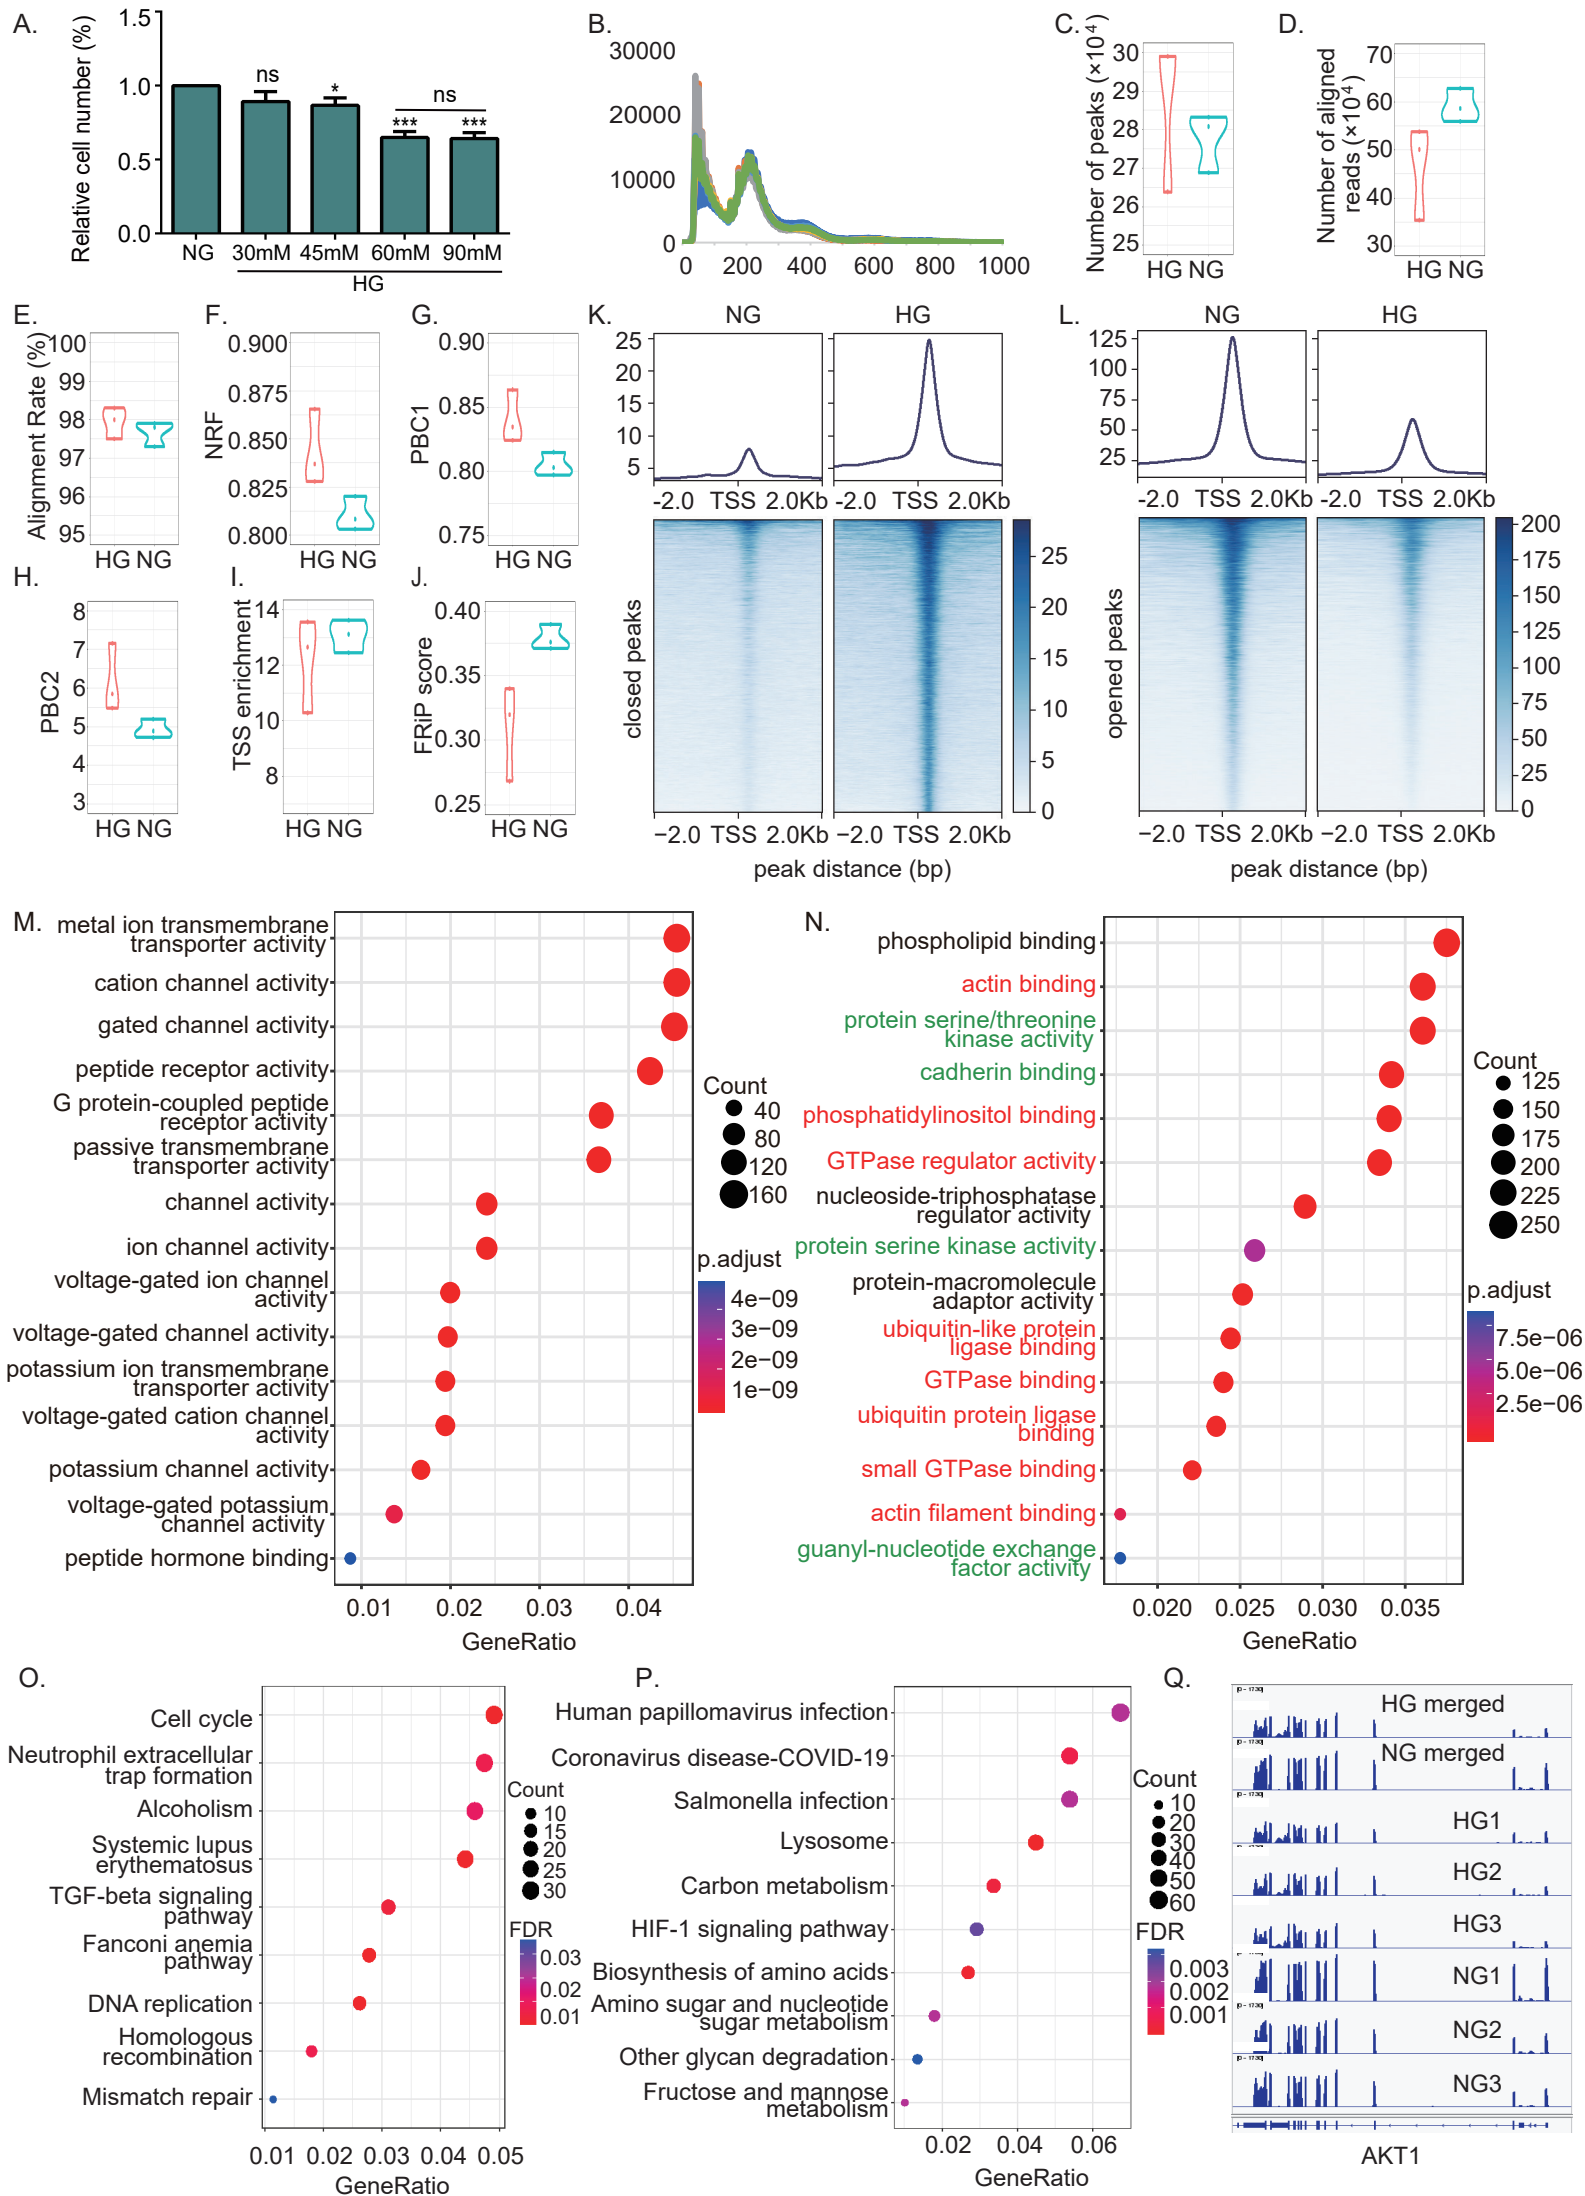

**Figure S1. JunB exhibits the reductions in both motif accessibility and gene expression level under high-glucose induction. Related to Figure 1.–**

(A) The effects of high glucose with different concentrations on influencing HUVEC cell number.

(B) Fragment size distribution of ATAC-seq libraries obtained from each sample. Clear modulation of signals indicates nucleosome-free, mononucleosome and dinucleosome regions.

(C) The distribution of the number of peaks across all samples.

(D) The distribution of the number of reads after alignment and filtering across all samples.

(E) The distribution of the percentage of reads after alignment and filtering across all samples.

(F) The distribution of Non Redundant Fraction (NRF) across all samples.

(G) The distribution of PCR Bottlenecking Coefficients 1 (PBC1) across all samples.

(H) The distribution of PCR Bottlenecking Coefficients 2 (PBC2) across all samples.

(I) The distribution of the transcription start site (TSS) enrichment scores across all samples.

(J) The distribution of the fraction of reads in called peak regions (FRiP) scores across all samples.

(K and L) Heatmaps showing chromatin accessibility in increased accessible (K) and decreased accessible (L) regions comparing HG to NG. For the heatmaps, ATAC counts of all 3 samples per group were merged. Plots on the top show the average ATAC-signal across regions.

(M and N) Gene ontology (GO) analysis of HG and NG was performed on the nearest genes of increased accessible (M) and decreased accessible (N) regions. Gene ratio refers to the ratio of the number of genes enriched in each term to the total number of genes in the term. Green, related to proliferation; Red, related to apoptosis.

(O and P) Kyoto Encyclopedia of Genes and Genomes (KEGG) analysis of HG and NG was performed on decreased expressed (O) and increased expressed (P) genes.

(Q) Genome browser tracks show mRNA-seq signals of AKT1 gene in all samples. All

the track lines have the same Y axis limits and that the peak height is normalized by the total read depth of each sample.

Error bars represent mean  $\pm$  SD, n = 3 independent experiments if not stated.

Significance was determined using two-tailed t test. \* P < 0.05, \*\* P < 0.01, \*\*\* P < 0.001, \*\*\*\* P < 0.0001.

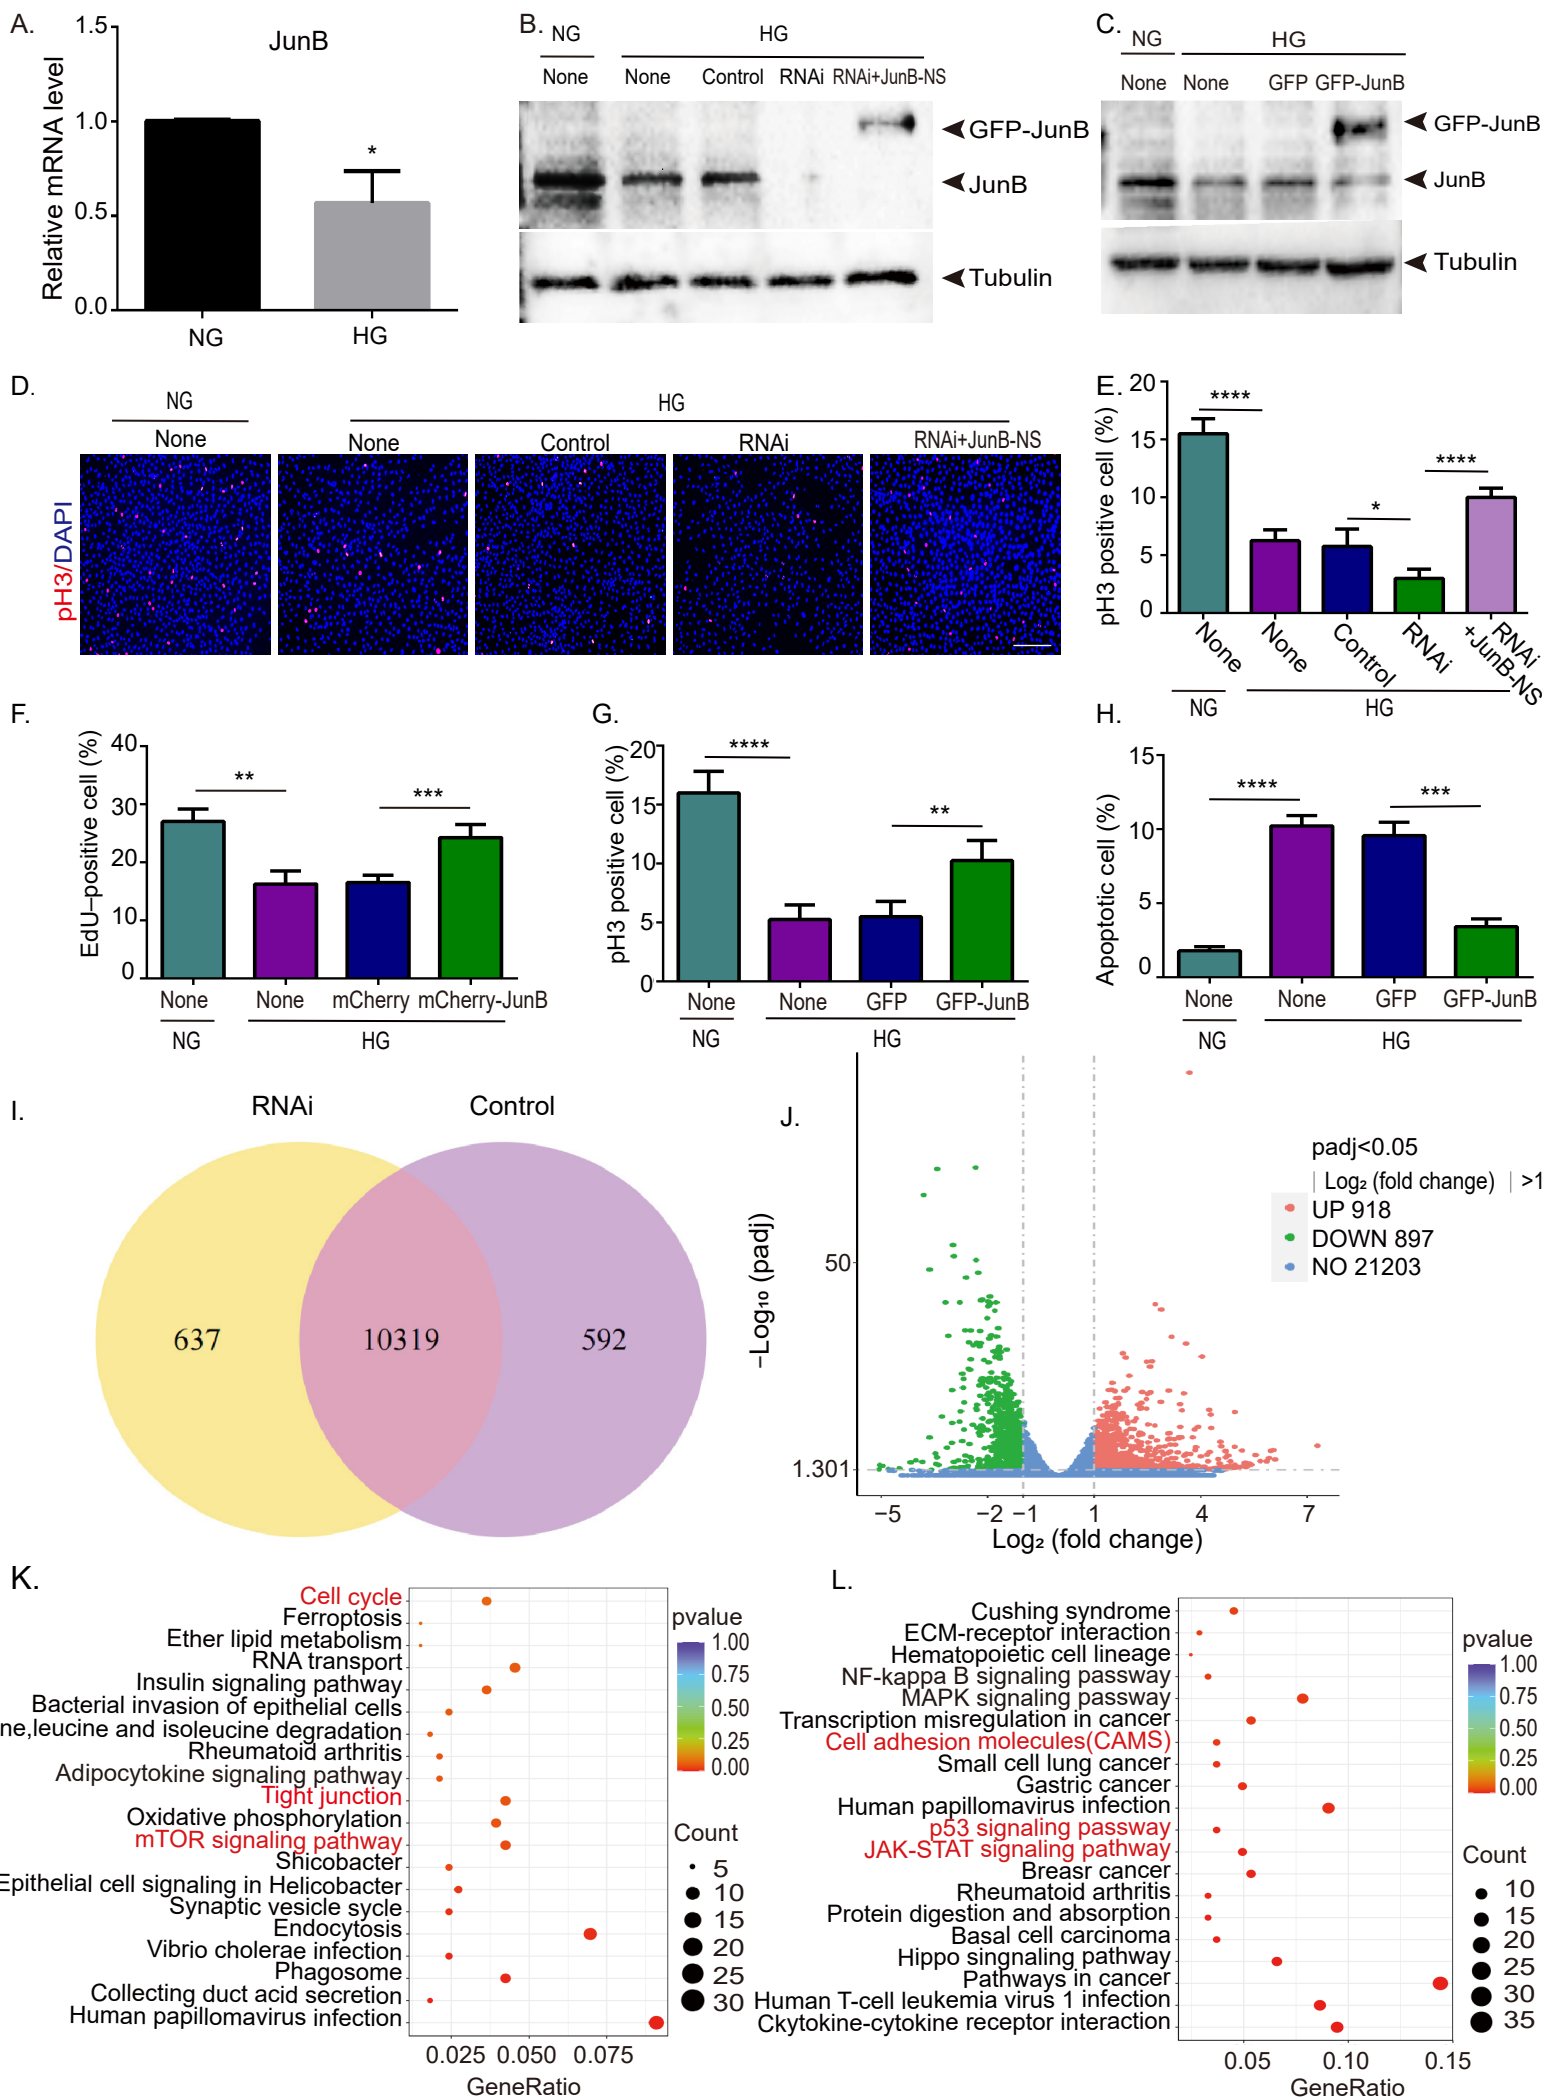



**Figure S2. JunB reversed the effects of high glucose on endothelial cell proliferation and apoptosis. Related to Figure 2.**

(A-H) Effects of 60mM glucose treatment on the JunB level, proliferation and apoptosis of HUVECs.

(A) RT-qPCR of HUVECs treated with high glucose showed the increased mRNA level of JunB.

(B) Western blotting showed high glucose and RNAi reduced the protein level of JunB, and rescue increased the protein level of JunB-NS.

(C) Western blotting showed high glucose reduced the protein level of JunB, and overexpression by lentivirus infection increased the protein level of GFP-JunB.

(D and E) The cell proliferation of JunB RNAi and rescue HUVECs treated with high glucose was determined by pH3 assay. Representative images of pH3 and DAPI staining (D) and the percentage of pH3 positive cell (E). Scale bar, 250  $\mu$ m.

(F) The cell proliferation of mCherry-JunB overexpression HUVECs treated with high glucose was determined by EdU assay, and the percentage of EdU-positive cell were shown.

(G) The cell proliferation of GFP-JunB overexpression HUVECs treated with high glucose was determined by pH3 assay, and the percentage of pH3 positive cell were shown.

(H) Detect apoptotic cells of GFP-JunB overexpression HUVECs treated with high glucose by flow cytometry, and the percentage of apoptotic cell were shown.

(I) Venn diagram between the genes expressed in the HUVECs treated with control (purple circle) and JunB RNAi (orange circle) under the high-glucose induction.

(J) Volcano plot of RNA-seq genes comparing control and JunB RNAi HUVECs treated with high glucose. Genes with differentially expressed ( $p_{adj} < 0.05$  and  $|\log_2(\text{Fold Change})| > 1$ ) are highlighted. The number of genes with increased (red) and decreased (green) expression were calculated.

(K and L) Kyoto Encyclopedia of Genes and Genomes (KEGG) analysis of control and JunB RNAi HUVECs treated with high glucose was performed on decreased expressed (K) and increased expressed (L) genes ranked by the  $\log_2(\text{Fold Change})$  using the R

package "clusterProfiler". Gene ratio refers to the ratio of the number of genes enriched in each term to the total number of genes in the term.

Error bars represent mean  $\pm$  SD, n = 3 independent experiments if not stated.

Significance was determined using two-tailed t test. \* P < 0.05, \*\* P < 0.01, \*\*\* P < 0.001, \*\*\*\* P < 0.0001.

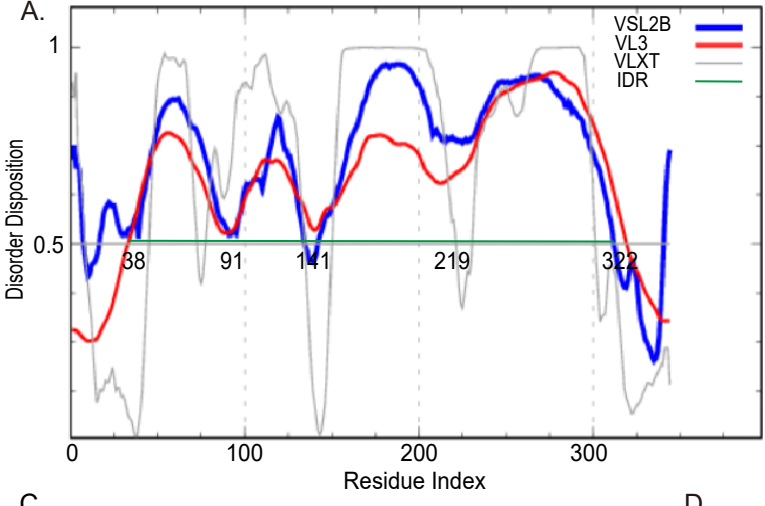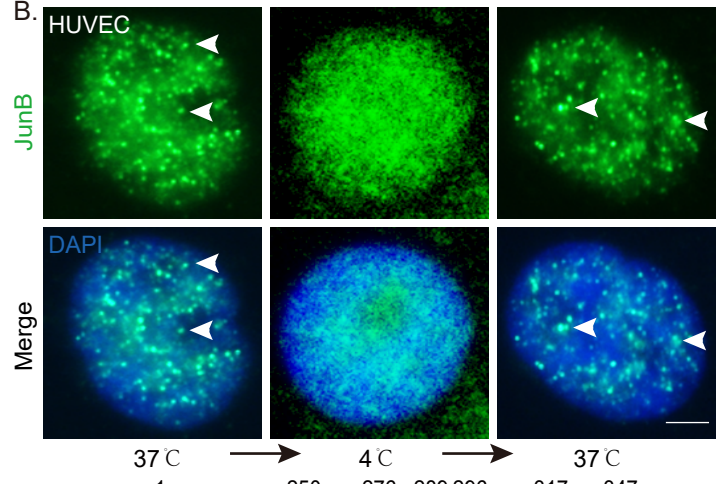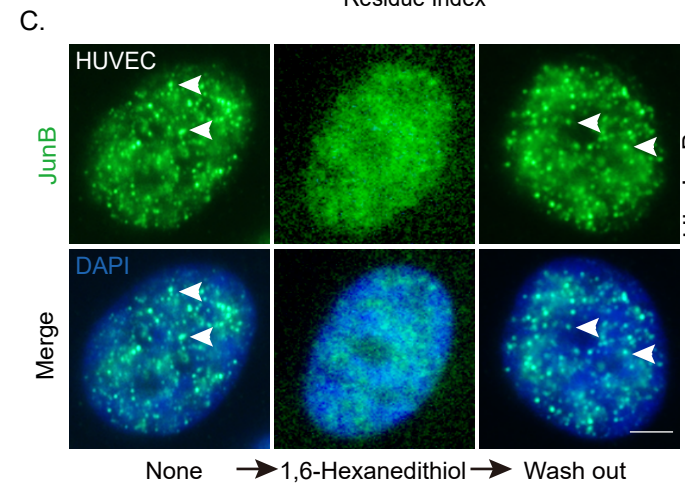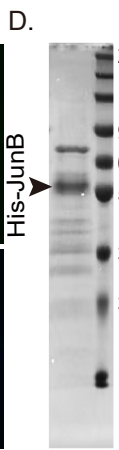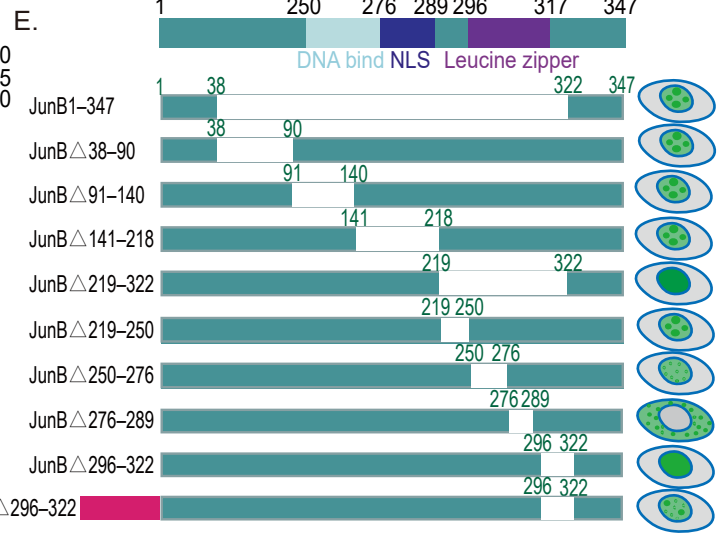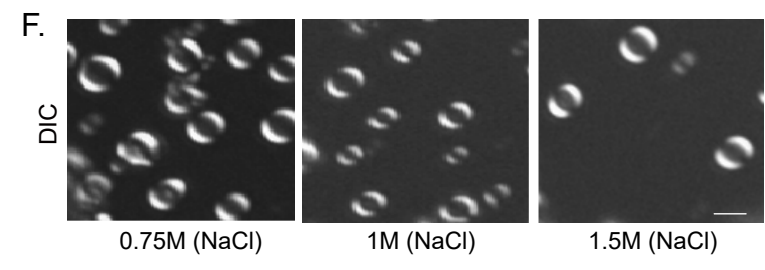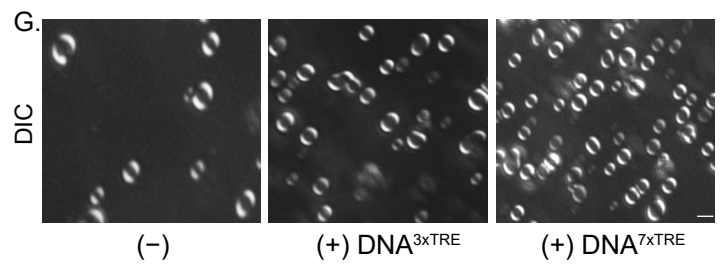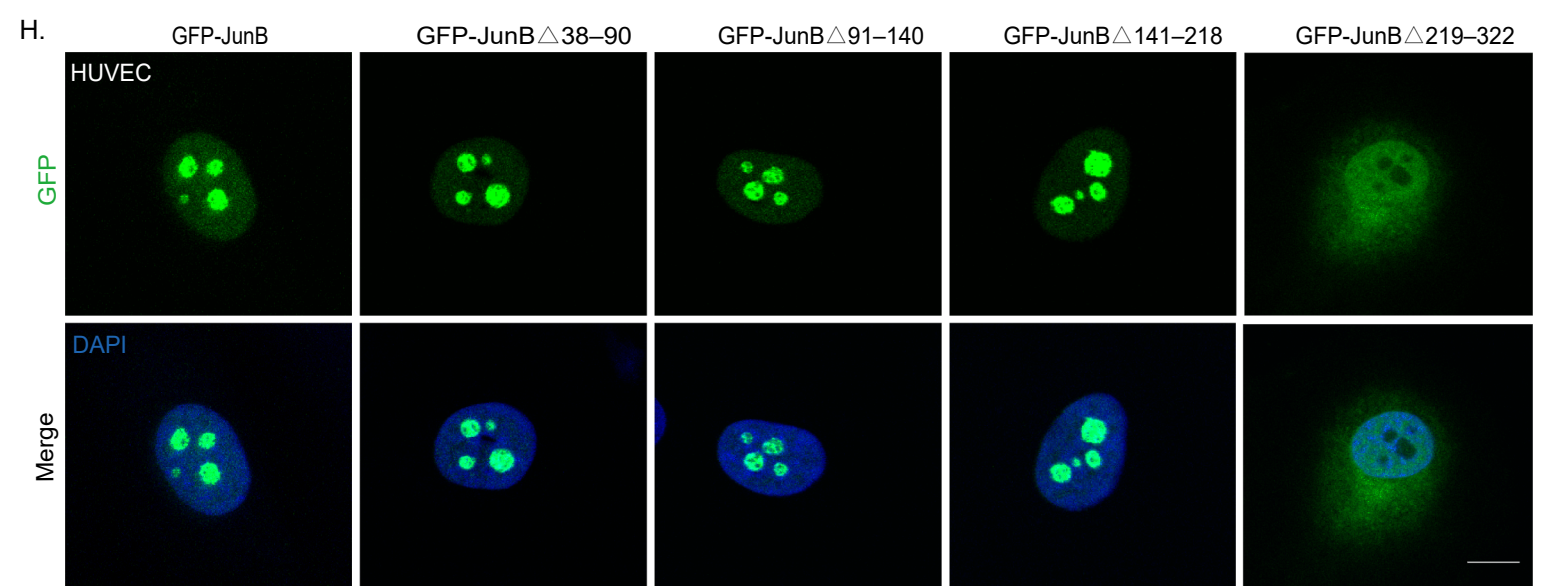

**Figure S3. In nucleus and in vitro, JunB undergoes LLPS. Related to Figure 3.**

(A) Sequence features of JunB. The line at 0.5 (y axis) is the cutoff for disorder ( $> 0.5$ ) and order ( $< 0.5$ ) predictions. VSL2B, VL3, and VLXT, predictors for disordered dispositions. IDR, predicted internal disorder region.

(B) Temperature-dependent puncta diffusion and re-formation of JunB in the nuclei of HUVECs by immunofluorescence staining. Temperature ramp, 4°C-37°C. Scale bar, 5  $\mu\text{m}$ .

(C) The incubated and wash-out of 1,6-hexanediol led puncta dissolution and re-formation of JunB in the nuclei of HUVECs by immunofluorescence staining. Scale bar, 5  $\mu\text{m}$ .

(D) Coomassie brilliant blue staining of JunB protein purified in vitro. The arrow showed His-JunB.

(E) Illustration depicting how different mutants of JunB were constructed.

(F) The NaCl concentration varying among 0.75M, 1M, 1.5M modulated the formation of JunB droplets in vitro. Scale bar, 2  $\mu\text{m}$ .

(G) The concentration of DNA fragment TRE repeat varying among 0, 3xTRE and 7xTRE modulated the formation of JunB droplets in vitro. Scale bar, 2  $\mu\text{m}$ .

(H) Different GFP-JunB mutants were overexpressed in HUVECs to observe the formation of puncta. Scale bar, 10  $\mu\text{m}$ .

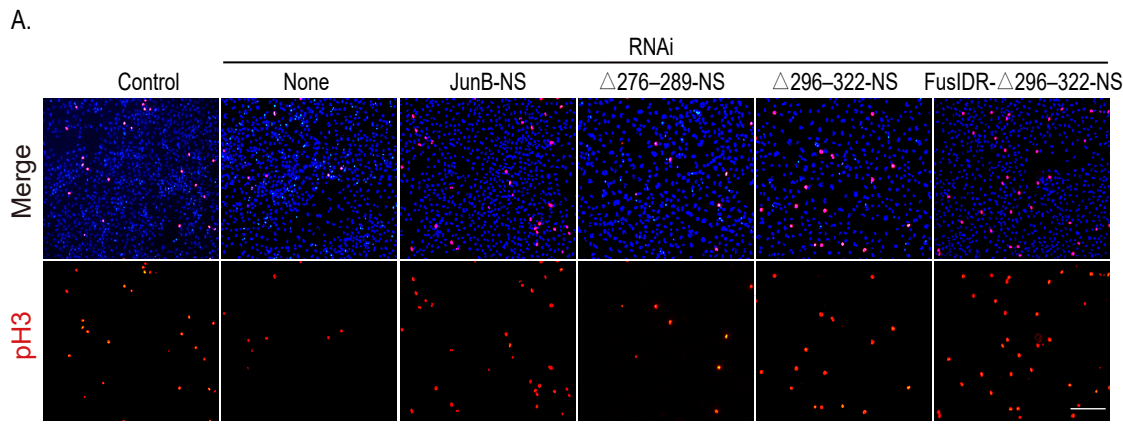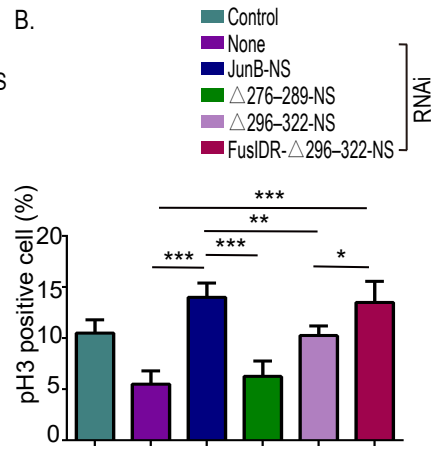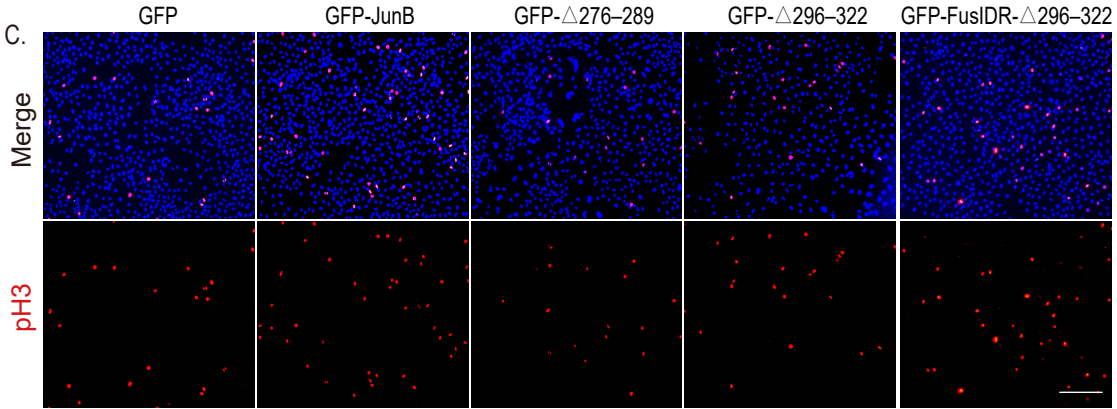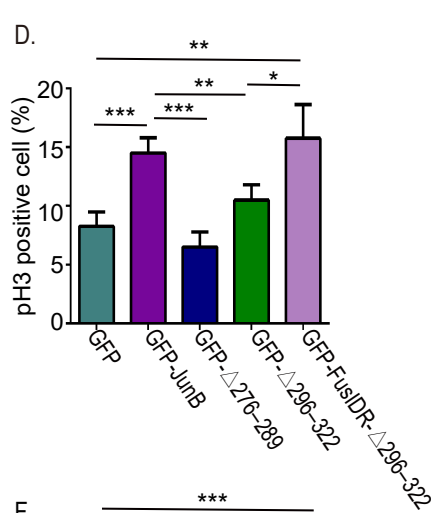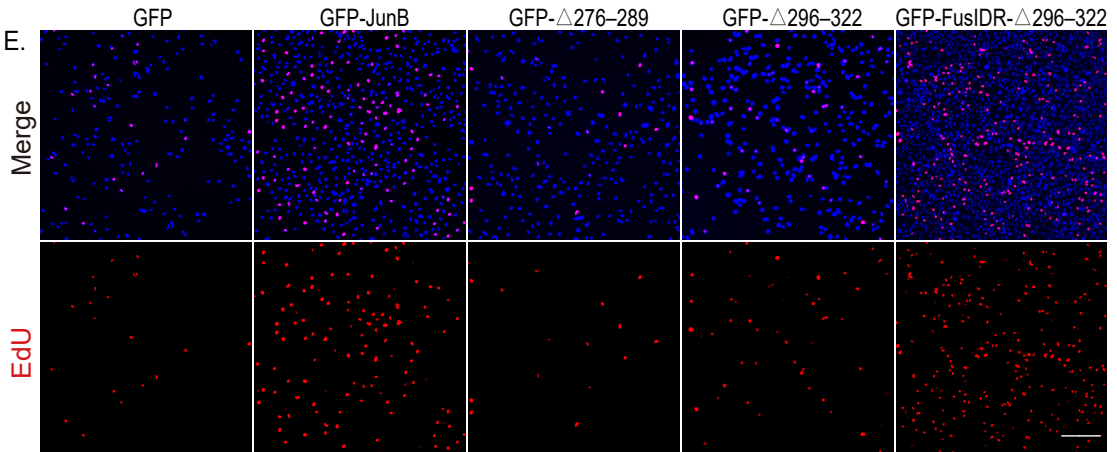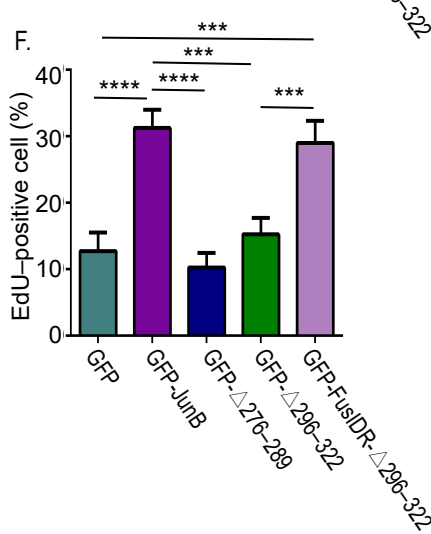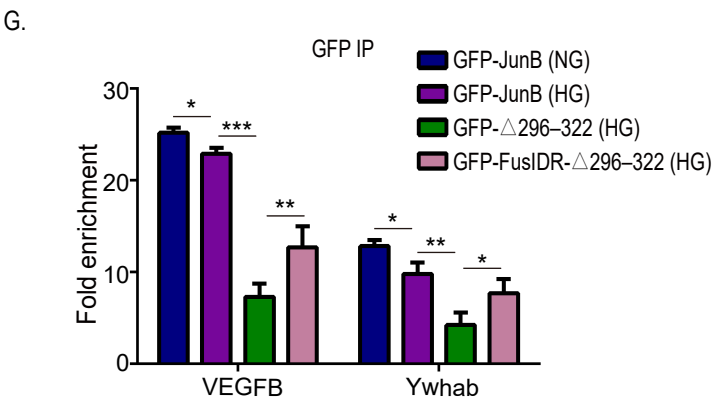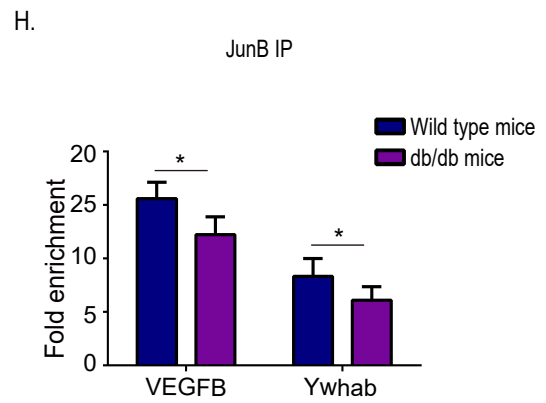

**Figure S4. The nuclear localization and condensation of JunB modulate its functions in endothelial cell proliferation and apoptosis induced by high glucose.**

**Related to Figure 4.**

(A-B) The cell proliferation of JunB RNAi HUVECs treated with high glucose, lentivirus infection with different mutants after JunB RNAi, and overexpression of different JunB-NS mutants by lentivirus infection was determined by pH3 assay. Representative images of pH3 and DAPI staining (A) and the percentage of pH3 positive cell (B). Scale bar, 250  $\mu$ m.

(C-D) The cell proliferation of HUVECs treated with high glucose and overexpressed by different GFP-JunB mutants was determined by pH3 assay. Representative images of pH3 and DAPI staining (C) and the percentage of pH3 positive cell (D). Scale bar, 250  $\mu$ m.

(E-F) The cell proliferation of HUVECs treated with high glucose and overexpression of different GFP-JunB mutants by lentivirus infection was determined by EdU incorporation assay. Representative images of EdU incorporation and DAPI staining (E) and the percentage of EdU-positive cell (F). Scale bar, 250  $\mu$ m.

(G) Results of ChIP-qPCR assays in HUVECs under different treatments and conditions.

(H) Results of ChIP-qPCR assays with vascular endothelial cells isolated from C57BL/6 mice or db/db mice

Error bars represent mean  $\pm$  SD, n = 3 independent experiments if not stated.

Significance was determined using two-tailed t test. \* P < 0.05, \*\* P < 0.01, \*\*\* P < 0.001.

**Table S1. Primers for different plasmid constructs in this study**

| Name                                     | Forward primer (5'-3')                                 | Reverse primer (3'-5')                                |
|------------------------------------------|--------------------------------------------------------|-------------------------------------------------------|
| pET-32a-His-JunB                         | AAGGCCATGGCTGATATCG<br>GATCCATGTGCACTAAAAT<br>GGAACAGC | ACGGAGCTCGAATTCGGAT<br>CCTCAGAAGGCGTGTCCCT            |
| PLV-GFP-JUNB                             | TCAGATCTCGAGCTCAAGC<br>TTCGATGTGCACTAAAATG<br>GAACAGC  | CGGTACCGTCGACTGCAGA<br>TCAGAAGGCGTGTCCCT              |
| PLV-mCherry-JUNB                         | TCAGATCTCGAGCTCAAGC<br>TTCGATGTGCACTAAAATG<br>GAACAGC  | CGGTACCGTCGACTGCAGA<br>TCAGAAGGCGTGTCCCT              |
| PLV-JUNB-NS                              | CTACTCAAGCCGAGCCTGG<br>CGGTCAACCT                      | CTTATAATCGTGTAGAGAG<br>AGGCCACCAGGGGCC                |
| PLV-JUNB $\Delta$<br>37-90               | ATTGTCCCCAACAGCAACG<br>GC                              | CGGTTTCAGGAGTTTGTAG<br>TCGTGTAGAGA                    |
| PLV-JUNB $\Delta$<br>91-140              | AAAGCCCTGGACGATCTGC<br>AC                              | CAGGCGTTCCAGCTCCGA<br>A                               |
| PLV-JUNB $\Delta$<br>141-218             | GCGCCGCCCTTCGCC                                        | GACAAAGCCGTCGGCGAA<br>GC                              |
| PLV-JUNB $\Delta$<br>219-322             | CAGCTCAAACAGAAGGTC<br>ATGACCCAC                        | GTGTGGGAGGTAGCTGATG<br>GTGG                           |
| PLV-JUNB $\Delta$<br>219-250             | AGCCGGGACGCCACG                                        | GTGTGGGAGGTAGCTGATG<br>GTGG                           |
| PLV-JUNB $\Delta$<br>250-276             | CGGAACCGGCTGGCGG                                       | CGCCTCCGGCACGGT                                       |
| PLV-JUNB $\Delta$<br>276-289             | CTGGAGCGCATCGCGC                                       | CCGCTTGCCTCCACTTTG<br>A                               |
| PLV-JUNB $\Delta$<br>296-322             | CAGCTCAAACAGAAGGTC<br>ATGACCCAC                        | GCGCGCGATGCGCT                                        |
| PLV-FusIDR-<br>JUNB $\Delta$ 296-<br>322 | TCAGATCTCGAGCTCAAGC<br>TTCGATGGCCTCAAACGAT<br>TATACCC  | TCAGATCTCGAGCTCAAGC<br>TTCGATGGCCTCAAACGAT<br>TATACCC |

| <b>Name</b>                        | <b>Forward primer (5'-3')</b>                         | <b>Reverse primer (3'-5')</b>                         |
|------------------------------------|-------------------------------------------------------|-------------------------------------------------------|
| PLV-JUNBΔ<br>37-90-NS              | ATTGTCCCCAACAGCAACG<br>GC                             | CGGTTTCAGGAGTTTGTAG<br>TCGTGTAGAGA                    |
| PLV-JUNBΔ<br>91-140-NS             | AAAGCCCTGGACGATCTGC<br>AC                             | CAGGCGTTCCAGCTCCGA<br>A                               |
| PLV-JUNBΔ<br>141-218-NS            | GCGCCGCCCTTCGCC                                       | GACAAAGCCGTCGGCGAA<br>GC                              |
| PLV-JUNBΔ<br>219-322-NS            | CAGCTCAAACAGAAGGTC<br>ATGACCCAC                       | GTGTGGGAGGTAGCTGATG<br>GTGG                           |
| PLV-JUNBΔ<br>219-250-NS            | AGCCGGGACGCCACG                                       | GTGTGGGAGGTAGCTGATG<br>GTGG                           |
| PLV-JUNBΔ<br>250-276-NS            | CGGAACCGGCTGGCGG                                      | CGCCTCCGGCACGGT                                       |
| PLV-JUNBΔ<br>276-289-NS            | CTGGAGCGCATCGCGC                                      | CCGCTTGCGCTCCACTTTG<br>A                              |
| PLV-JUNBΔ<br>296-322-NS            | CAGCTCAAACAGAAGGTC<br>ATGACCCAC                       | GCGCGCGATGCGCT                                        |
| PLV-FusIDR-<br>JUNBΔ296-<br>322-NS | TCAGATCTCGAGCTCAAGC<br>TTCGATGGCCTCAAACGAT<br>TATACCC | TCAGATCTCGAGCTCAAGC<br>TTCGATGGCCTCAAACGAT<br>TATACCC |



**Table S2. Primers for RT-qPCR in this study**

| <b>Gene name</b>      | <b>Forward primer (5'-3')</b> | <b>Reverse primer (3'-5')</b> |
|-----------------------|-------------------------------|-------------------------------|
| JunB                  | AACAGCCCTTCTACCACG<br>AC      | CAGGCTCGGTTTCAGGA<br>GTT      |
| CDC25B                | GCATGGAGAGTCTCATTA<br>GTGC    | CTCCGCCTCCGCTTATTCT           |
| SKP1                  | AAGACCATGTTGGAAGAT<br>TTGGGA  | ATCTTCAGGAGGAGGAG<br>GGTC     |
| YWHAB                 | CTGGAGACAACAAACAA<br>ACCACT   | GAATTGGGTGTGTAGGCT<br>GC      |
| MAD2L1                | GGCCGAGTTCTTCTCATT<br>CG      | TTACAAGCAAGGTGAGT<br>CCGT     |
| GADD45A               | GAGAGCAGAAGACCGAA<br>AGGA     | CACAACACCACGTTATCG<br>GG      |
| GADD45B               | TACGAGTCGGCCAAGTTG<br>ATG     | GGATGAGCGTGAAGTGG<br>ATTT     |
| BBC3                  | GCCAGATTTGTGAGACA<br>AGAGG    | CAGGCACCTAATTGGGCT<br>C       |
| actin                 | TGTCACCAACTGGGACG<br>ATA      | GGGGTGTGTAAGGTCTC<br>AAA      |
| VEGFB-human<br>(ChIP) | ACTGCTAGCAGCCTGC              | AGGGCTCAGAGTGGC               |
| VEGFB-mouse<br>(ChIP) | TGCCTCCAGAAAGCTCC<br>AGG      | CCTGGAGGCCGAGCTCC             |
| Ywhab-human<br>(ChIP) | AGACAGGGTCTCACTCT<br>GTCTC    | GTAGGGTCGAGCAGTG              |
| Ywhab-mouse<br>(ChIP) | GCTGAGCAAGGCAGCAT<br>CTC      | GGTTTCTATTGCTGTGAT<br>GCTGGG  |

**Table S3. Reagent used in this study**

| Reagent                                                                               | Source                    | Identifier                     |
|---------------------------------------------------------------------------------------|---------------------------|--------------------------------|
| Antibodies                                                                            |                           |                                |
| anti-JunB                                                                             | Abcam                     | Cat# ab128878                  |
| anti-JunB                                                                             | Cell Signaling Technology | Cat# 3753S                     |
| anti-pH3                                                                              | Millipore                 | Cat# 06-570                    |
| anti-CD31                                                                             | BD Biosciences            | Cat#561073                     |
| anti-Tubulin                                                                          | Cell Signaling Technology | Cat#2148S;<br>RRID:AB_2288042  |
| Goat anti-Rabbit IgG (H+L) Highly Cross-Adsorbed Secondary Antibody, Alexa Fluor™ 488 | Thermo Scientific Fisher  | Cat# A-11001; RRID: AB_2534069 |
| Goat anti-Rabbit IgG (H+L) Highly Cross-Adsorbed Secondary Antibody, Alexa Fluor™ 647 | Thermo Scientific Fisher  | Cat# A-21235; RRID: AB_2535804 |
| goat anti-rabbit HRP                                                                  | Beyotime Biotechnology    | Cat# A0208;<br>RRID:AB_2892644 |
| Chemicals, peptides, and recombinant proteins                                         |                           |                                |
| DMEM medium                                                                           | Gibco                     | Cat# C11885500cp               |
| fetal bovine serum                                                                    | Gibco                     | Cat# 16000-044                 |
| 1,6-hexanediol                                                                        | sigma                     | Cat#240117                     |
| polyBrene                                                                             | Solarbio                  | Cat# H8761                     |
| DAPI (4',6-Diamidino-2-phenylindole dihydrochloride)                                  | Sigma-Aldrich             | Cat# D8417                     |
| Trypsin-EDTA                                                                          | Thermo Scientific Fisher  | Cat# 15400-054                 |
| Triton X-100                                                                          | Biofroxx                  | Cat# 9002-93-1                 |

| <b>Reagent</b>                                  | <b>Source</b>             | <b>Identifier</b> |
|-------------------------------------------------|---------------------------|-------------------|
| Critical commercial assays                      |                           |                   |
| HiScript III RT SuperMix for qPCR               | Vazyme                    | Cat# R323-01      |
| SimpleChIP Enzymatic Chromatin IP Kit           | Cell Signaling Technology | Cat# 91820        |
| SimpleChIP Universal qPCR Master Mix            | Cell Signaling Technology | Cat# 88989P       |
| ChromoTek GFP-Trap® Magnetic Agarose            | proteintech               | Cat# gtma         |
| lipofectamine RNAiMAX                           | Invitrogen                | Cat# 13778150     |
| MinElute PCR Purification Kit                   | Qiagen                    | Cat# 28004        |
| Collagenase II                                  | Worthington               | Cat# LS004176     |
| Q5 Site-Directed Mutagenesis Kit                | NEB                       | Cat#E0552S        |
| QuickBlock™ Blocking Buffer for Western Blot    | Beyotime                  | Cat# P0256        |
| TruePrep™ DNA Library Prep Kit V2 for Illumina® | Vazyme                    | Cat# TD501-02     |
| TUNEL BrightRed Apoptosis Detection Kit         | Vazyme                    | Cat# A113-01      |
| DeadEnd™ Fluorometric TUNEL System              | Promega                   | Cat#G328A         |
| VAHTS DNA Clean Beads                           | Vazyme                    | Cat# N411         |
| Lipo8000™ Transfection Reagent                  | Beyotime Biotechnology    | Cat# C0533        |
| BCA kit                                         | BOSTER                    | Cat# AR0146A      |
| ChamQ Universal SYBR qPCR Master Mix            | Vazyme                    | Cat# Q711-02      |
| ECL Prime Western Blotting Detection Reagent    | Thermo                    | Cat# 45-002-401   |
| EDU Kit                                         | Abbkine                   | Cat#KTA2030       |

| <b>Reagent</b>                  | <b>Source</b> | <b>Identifier</b>                                               |
|---------------------------------|---------------|-----------------------------------------------------------------|
| EDU Kit                         | Abbkine       | Cat#KTA2031                                                     |
| Deposited data                  |               |                                                                 |
| RNA-sequencing data             | This paper    | N/A                                                             |
| ATAC-seq data                   | This paper    | N/A                                                             |
| Experimental models: Cell lines |               |                                                                 |
| 293T cell                       | ATCC          | N/A                                                             |
| HUVEC                           | ATCC          | N/A                                                             |
| Software and algorithms         |               |                                                                 |
| Prism 7.0                       | GraphPad      | <a href="https://www.graphpad.com">https://www.graphpad.com</a> |
| LAS X                           | Leica         | N/A                                                             |
